# Supplementary material for: Smartphone-Based Image Analysis for Rapid Evaluation of Kiwifruit Quality during Cold Storage
Source: MDPI journal article supplement (doi:10.3390/foods11142113), 2022-07-15
Supplement: s1 [file s1]

Supplemental File

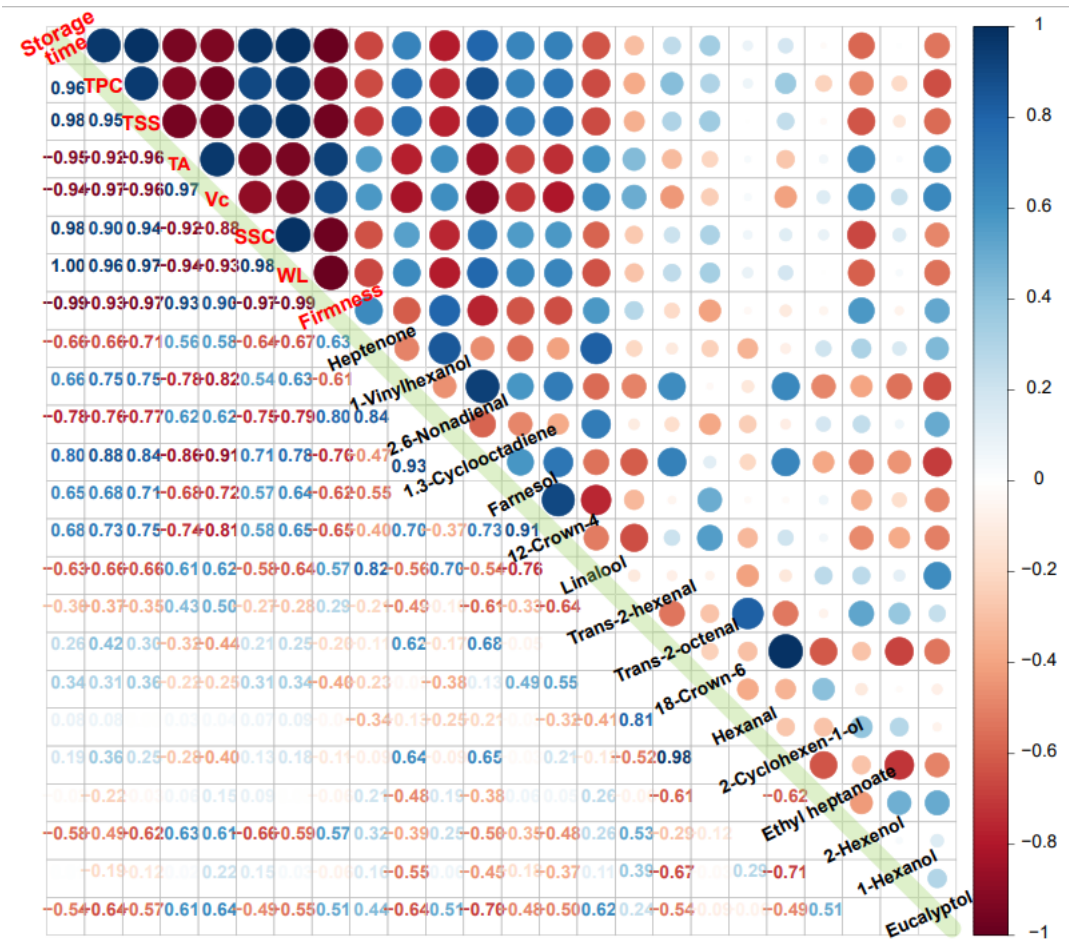

**Figure S1.** Correlation between all quality parameters and VFCs selected with storage time.

**Table S1.** R/G (the ratio of R value to G value in the RGB values of kiwifruit flesh), R/B, and B/G values in different parts of kiwifruit stored at 2°C for one month.

|        | Head | Head | Head | Central | Central | Central | Mesocarp | Mesocarp | Mesocarp |
|--------|------|------|------|---------|---------|---------|----------|----------|----------|
|        | R/B  | R/G  | B/G  | R/B     | R/G     | B/G     | R/B      | R/G      | B/G      |
| DAY 0  | 3.21 | 1.13 | 0.35 | 1.64    | 1.09    | 0.66    | 3.21     | 1.04     | 0.33     |
| DAY 3  | 3.46 | 1.13 | 0.33 | 1.71    | 1.10    | 0.64    | 3.29     | 1.04     | 0.31     |
| DAY 6  | 4.10 | 1.12 | 0.27 | 1.72    | 1.08    | 0.63    | 2.73     | 1.02     | 0.38     |
| DAY 9  | 2.46 | 1.05 | 0.43 | 1.95    | 1.04    | 0.53    | 2.43     | 1.04     | 0.43     |
| DAY 12 | 4.38 | 1.09 | 0.25 | 2.00    | 1.05    | 0.53    | 2.81     | 1.05     | 0.37     |
| DAY 15 | 3.96 | 1.09 | 0.28 | 2.37    | 1.11    | 0.47    | 3.19     | 1.06     | 0.33     |
| DAY 21 | 5.64 | 1.22 | 0.22 | 2.46    | 1.13    | 0.46    | 3.91     | 1.05     | 0.27     |
| DAY 18 | 6.57 | 1.12 | 0.17 | 2.79    | 1.11    | 0.40    | 3.56     | 1.06     | 0.30     |
| DAY 24 | 8.40 | 1.21 | 0.14 | 2.89    | 1.14    | 0.39    | 4.79     | 1.06     | 0.22     |
| DAY 27 | 9.18 | 1.12 | 0.12 | 3.26    | 1.12    | 0.34    | 3.71     | 1.03     | 0.28     |
| DAY 30 | 5.03 | 1.21 | 0.24 | 2.86    | 1.14    | 0.40    | 3.96     | 1.18     | 0.30     |
